# Supplementary material for: Too much detention? Street Triage and detentions under Section 136 Mental Health Act in the North-East of England: a descriptive study of the effects of a Street Triage intervention
Source: PubMed Central journal article supplement — BMJ Open. 2016 Nov 4;6(11):e011837. doi: 10.1136/bmjopen-2016-011837 (PMC5129089; doi:10.1136/bmjopen-2016-011837), 2016-11-04
Supplement: bmjopen-2016-011837supp_appendix.pdf [file bmjopen-2016-011837supp_appendix.pdf]

**Appendix 1. Changes in section 136 admissions, comparing corresponding three month blocks of time over a two year period**

|                                                    | September-November |                |           |                     | December-February |                |           |                     | March-May  |                |           |                     | June-August |                |           |                     |
|----------------------------------------------------|--------------------|----------------|-----------|---------------------|-------------------|----------------|-----------|---------------------|------------|----------------|-----------|---------------------|-------------|----------------|-----------|---------------------|
|                                                    | Sunderland         | South Tyneside | Gateshead | South of Tyne Total | Sunderland        | South Tyneside | Gateshead | South of Tyne Total | Sunderland | South Tyneside | Gateshead | South of Tyne Total | Sunderland  | South Tyneside | Gateshead | South of Tyne Total |
| <b>No of S136 - (2013/2014)</b>                    | 72                 | 37             | 44        | 153                 | 51                | 40             | 22        | 113                 | 36         | 38             | 58        | 132                 | 51          | 44             | 33        | 128                 |
| <b>No of S136 - (2014/2015)</b>                    | 18                 | 13             | 23        | 54                  | 11                | 4              | 15        | 30                  | 4          | 6              | 12        | 22                  | 3           | 4              | 8         | 15                  |
| <b>Change in number of S136</b>                    | -54                | -24            | -21       | -99                 | -40               | -36            | -7        | -83                 | -32        | -32            | -46       | -110                | -48         | -40            | -25       | -113                |
| <b>% reduction of S136</b>                         | 75%                | 65%            | 48%       | 65%                 | 78%               | 90%            | 32%       | 73%                 | 89%        | 84%            | 79%       | 83%                 | 94%         | 91%            | 76%       | 88%                 |
| <b>No of Street Triage contacts</b>                | 226                | 133            | 109       | 468                 | 191               | 83             | 92        | 366                 | 176        | 105            | 83        | 364                 | 200         | 86             | 111       | 397                 |
| <b>Ratio of Street Triage to reduction in S136</b> | 4.2                | 5.5            | 5.2       | 4.7                 | 4.8               | 2.3            | 13.1      | 4.4                 | 5.5        | 3.3            | 1.8       | 3.3                 | 4.2         | 2.2            | 4.2       | 3.5                 |
